# Supplementary material for: A two-dimensional Be2Au monolayer with planar hexacoordinate s-block metal atoms: a superconducting global minimum Dirac material with two perfect Dirac node-loops
Source: Royal Society of Chemistry journal article supplement (doi:10.1039/d2sc03614b), 2022-01-01
Supplement: d2sc03614b1.pdf [file d2sc03614b1.pdf]

## Supporting Information for

# Two-dimensional Be<sub>2</sub>Au Monolayer with Planar Hexacoordinate s-Block Metal Atoms: A Superconducting Global Minimum Dirac Material with Two Perfect Dirac Node-Loops

Meng-hui Wang,<sup>a</sup> Zhong-hua Cui,<sup>\*a,e</sup> Sheng Wang,<sup>c</sup> Quan Li,<sup>c</sup> Jijun Zhao,<sup>d</sup> and Zhongfang Chen<sup>\*b</sup>

*<sup>a</sup>Institute of Atomic and Molecular Physic, Jilin University, Changchun 130012, China*

*E-mail: zcui@jlu.edu.cn*

*<sup>b</sup>Department of Chemistry, University of Puerto Rico, San Juan, PR 00931, United States*

*E-mail: zhongfangchen@gmail.com*

*<sup>c</sup>State Key Laboratory of Superhard Materials, College of Physics, Jilin University, Changchun 130023, People's Republic of China*

*<sup>d</sup>Key Laboratory of Materials Modification by Laser, Ion and Electron Beams (Dalian University of Technology), Ministry of Education, Dalian 116024, China*

*<sup>e</sup>Key Laboratory of Physics and Technology for Advanced Batteries (Ministry of Education), Jilin University, Changchun 130012, China*

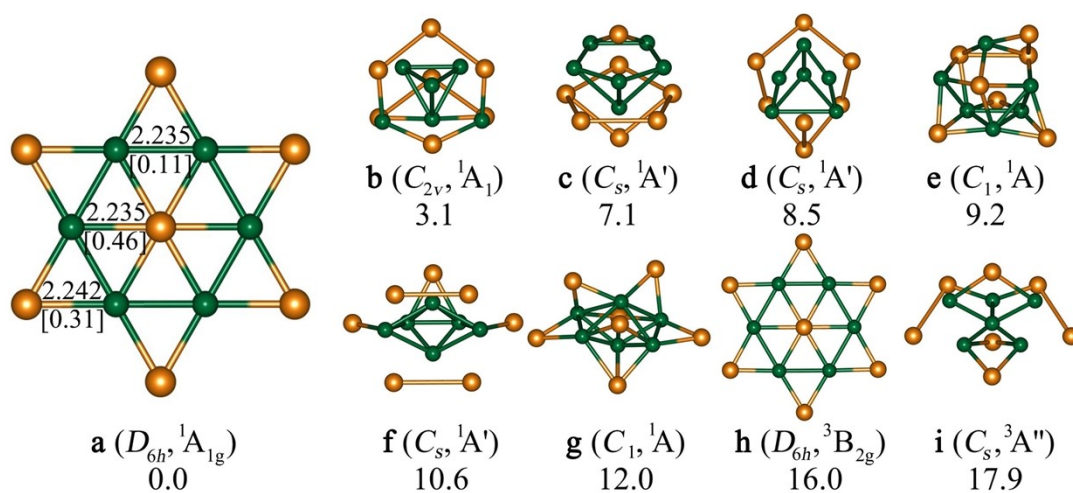

**Figure S1.** The structures and relative energies in kcal/mol of the low-lying energy isomers of  $\text{Be}_6\text{Au}_7^-$  computed at the CCSD(T)/def2-TZVP//PBE0/def2-TZVP. The bond distances in Å and WBI values (in square brackets) of phAu are given. Gold and green balls represent Au and Be atoms, respectively.

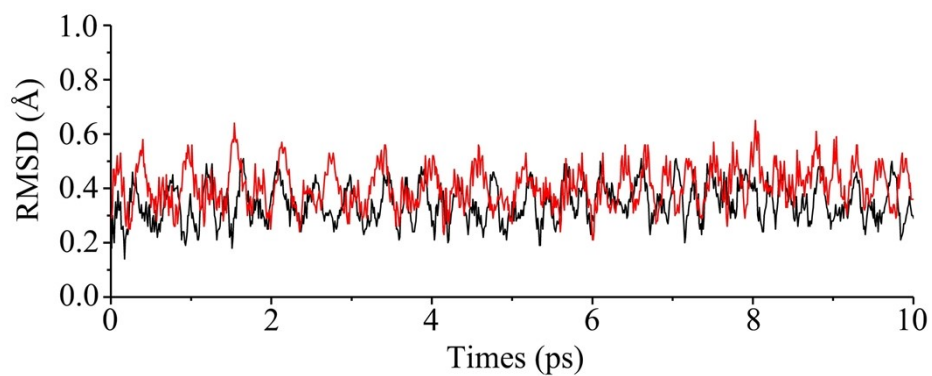

**Figure S2.** The RMSD vs simulation time of the isolated phAu Be<sub>6</sub>Au<sub>7</sub><sup>-</sup> at 300K (black line) and 600K (red line) computed at the PBE0/def2-SVP level.

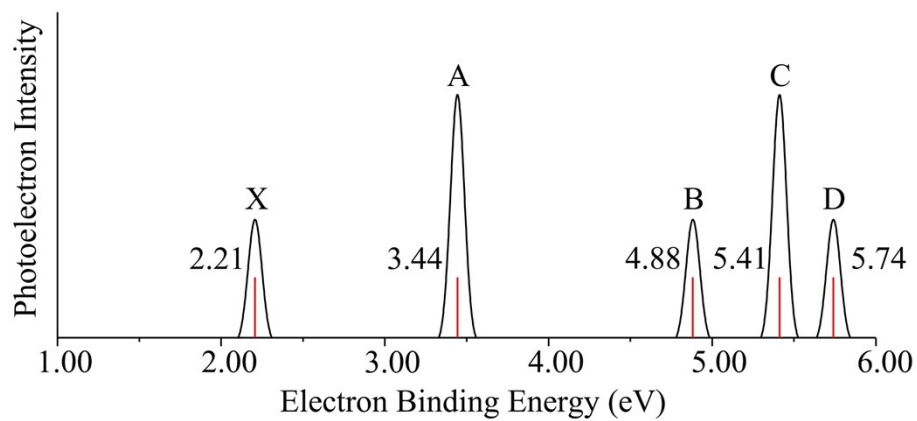

**Figure S3.** Simulated photoelectron spectroscopy (PES) of the phAu Be<sub>6</sub>Au<sub>7</sub><sup>-</sup> cluster.

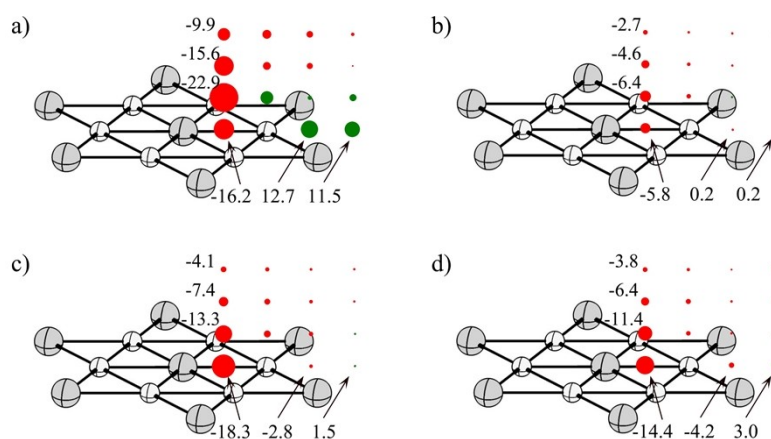

**Figure S4.** a) NICS<sub>zz</sub>, b) NICS<sub>zz</sub>( $\pi$ ), c) NICS<sub>zz</sub>( $\sigma$ -delocalization), d) NICS<sub>zz</sub>( $\sigma$ -localization) of the  $D_{6h}$  Be<sub>6</sub>Au<sub>7</sub><sup>-</sup> at the PBE0/def2-TZVP level. Diatropic (aromaticity) and paratropic (anti-aromaticity) tensors are shown in red and green, respectively. NICS values are in ppm.

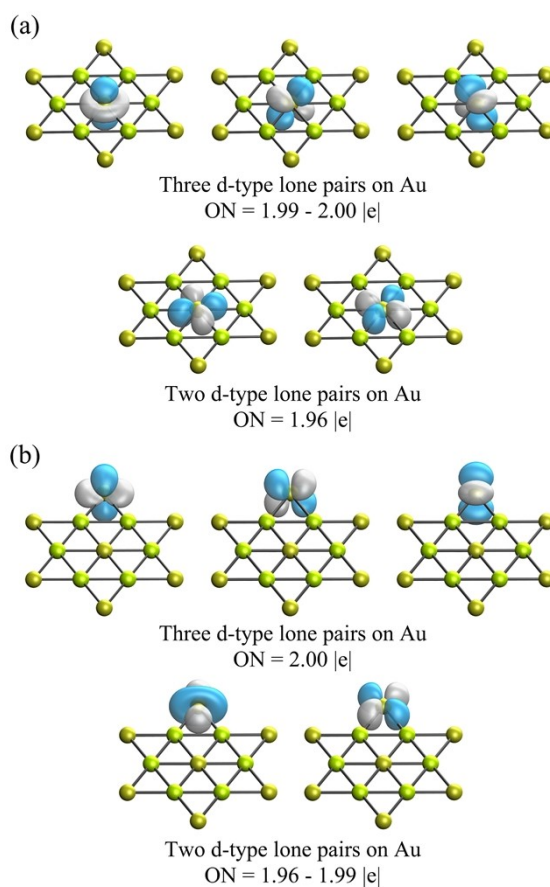

**Figure S5.** AdNDP of d-type lone pairs at a) phAu and b) bridging Au atoms.

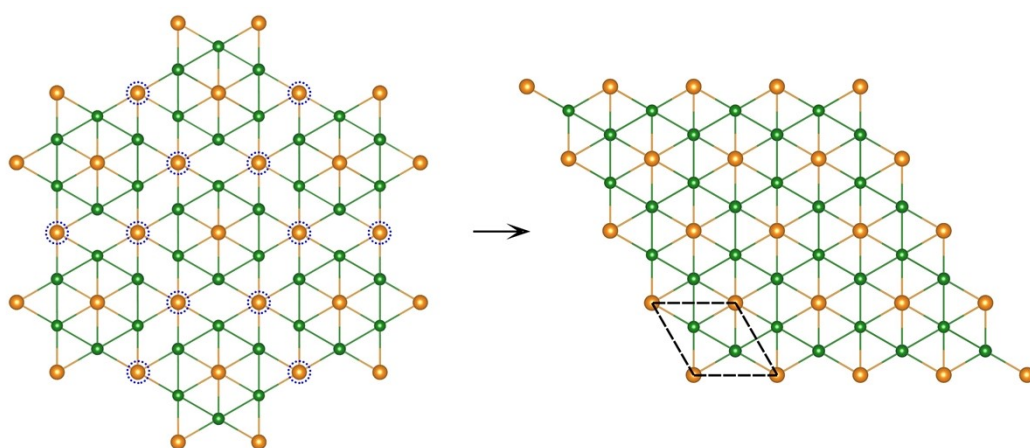

**Figure S6.** A schematic view of part of the extended 2D Be<sub>2</sub>Au monolayer as constructed from the starlike Be<sub>6</sub>Au<sub>7</sub> unit. The circles represent the bridging Au atoms in Be<sub>6</sub>Au<sub>7</sub> unit that are shared by three units.

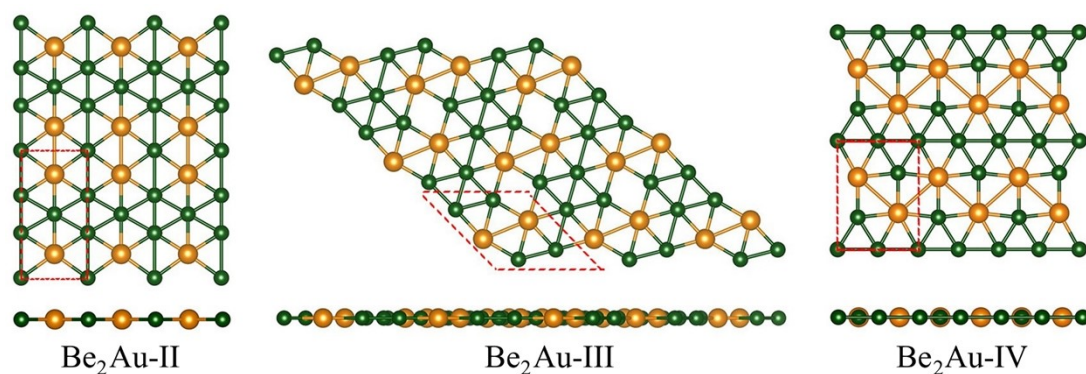

**Figure S7.** Three low-lying isomers of 2D  $\text{Be}_2\text{Au}$  found by particle swarm search. Gold and green balls represent Au and Be atoms, respectively.

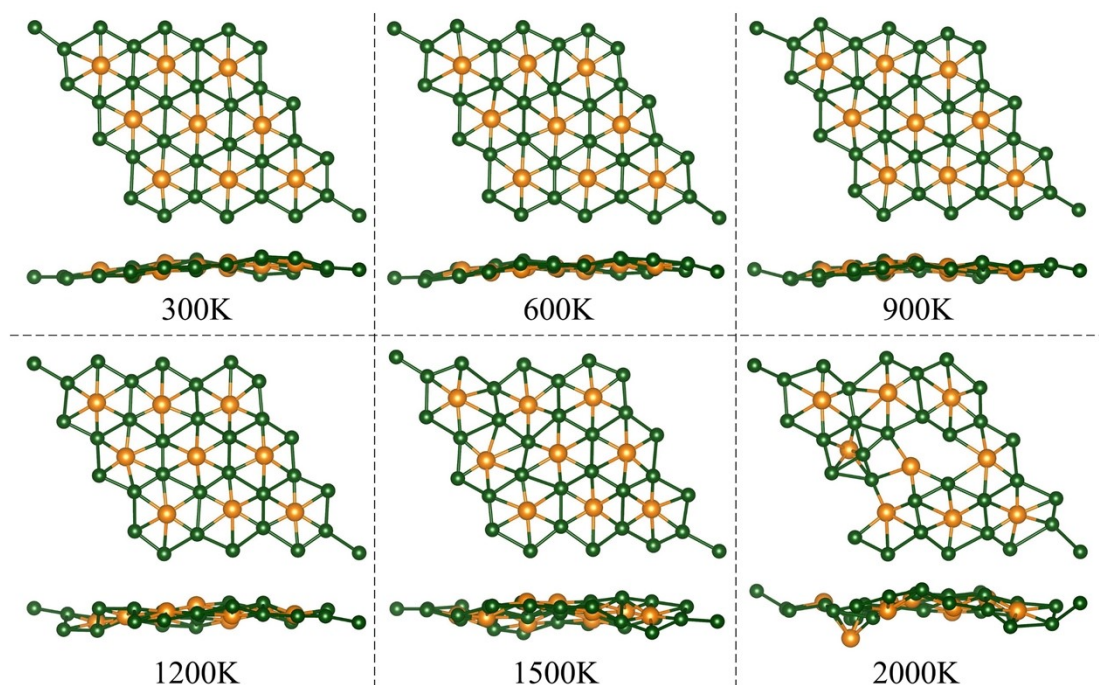

**Figure S8.** Snapshots of the equilibrium of the  $\text{Be}_2\text{Au}$  monolayer from 300 to 2000K (top and side views) at the end of 10 ps based on AIMD simulation, and bonds to atoms outside this  $4 \times 4$  section exit but are not show.



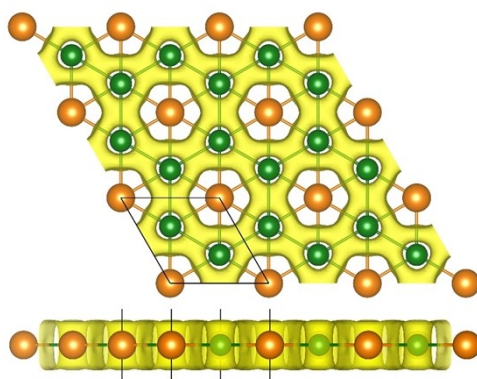

**Figure S9.** The 3D representation of ELF of Be<sub>2</sub>Au monolayer.

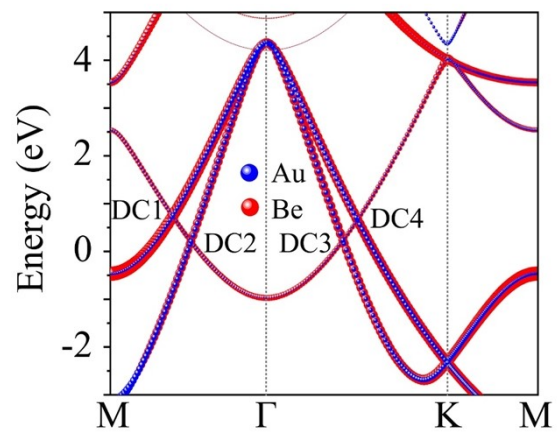

**Figure S10.** Band structure of Be<sub>2</sub>Au monolayer calculated by HSE06 functional.

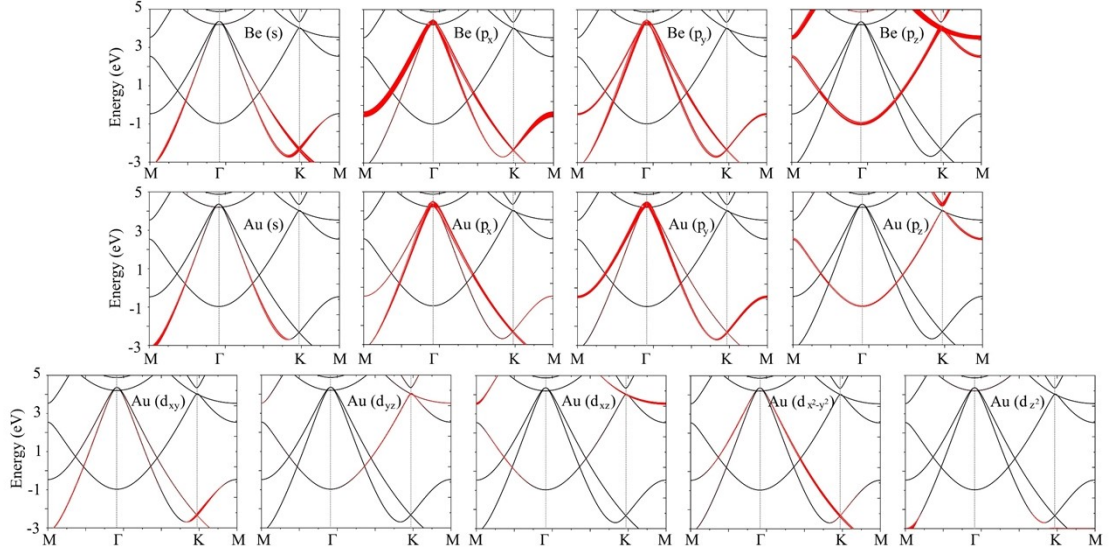

**Figure S11.** Projected band structures of Be<sub>2</sub>Au monolayer, indicating the  $\alpha/\beta$  bands are contributed by in-plane orbitals: Be  $p_x/p_y$ , Au  $p_x/p_y/d_{xy}/d_{x^2-y^2}$ , and the  $\gamma$  band is contributed by out-of-plane orbitals: Be  $p_z$ , Au  $p_z$ .

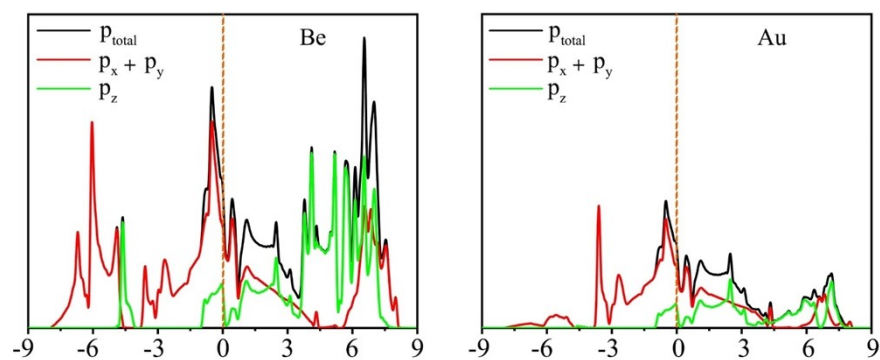

**Figure S12.** Atom-projected density of states (PDOS) of the Be<sub>2</sub>Au monolayer computed by HSE06 functional. The Fermi level is at 0 eV.

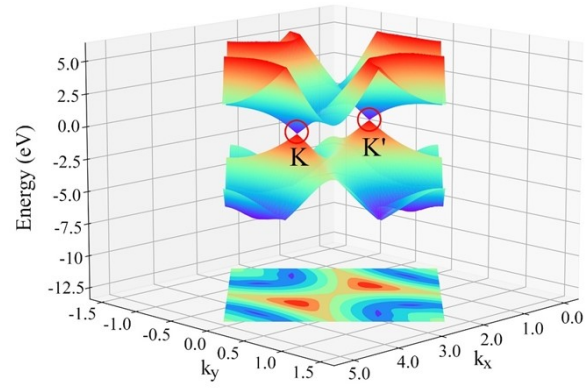

**Figure S13.** The three-dimensional band structure of the graphene.

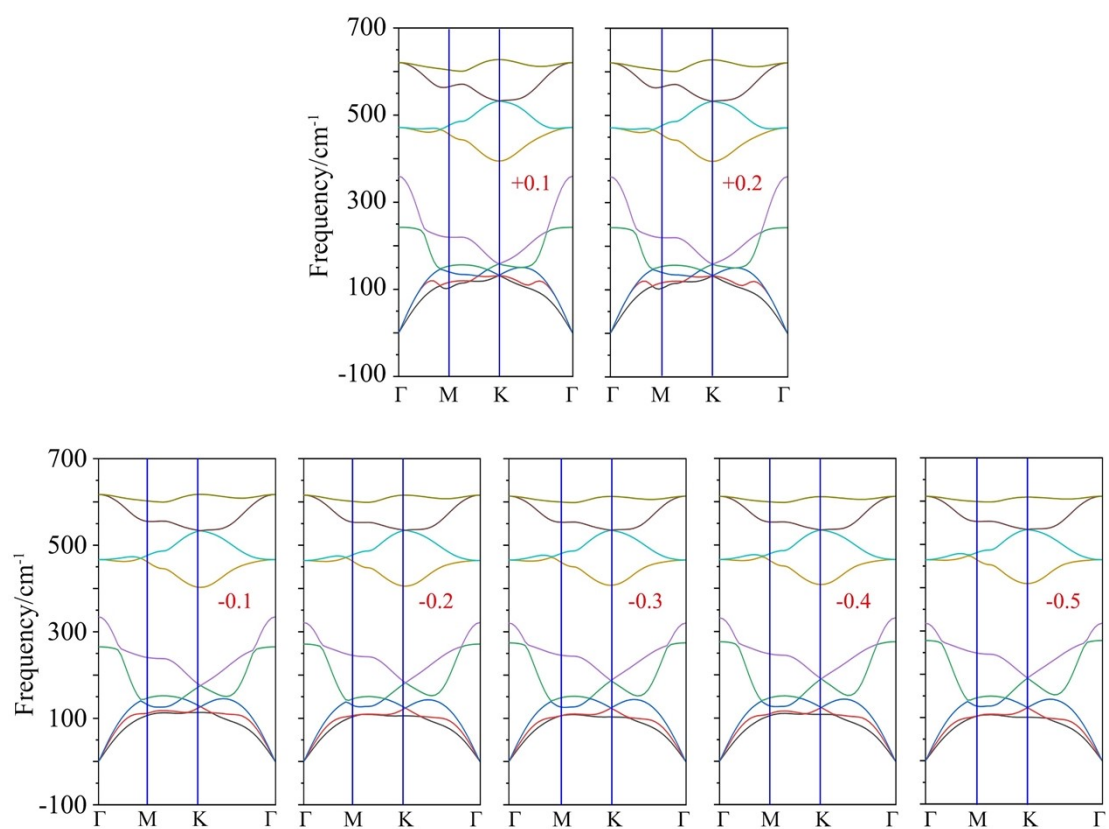

**Figure S14.** Phonon dispersion spectra for Be<sub>2</sub>Au monolayer under carrier doping from +0.2 to -0.5 electron per unit cell.

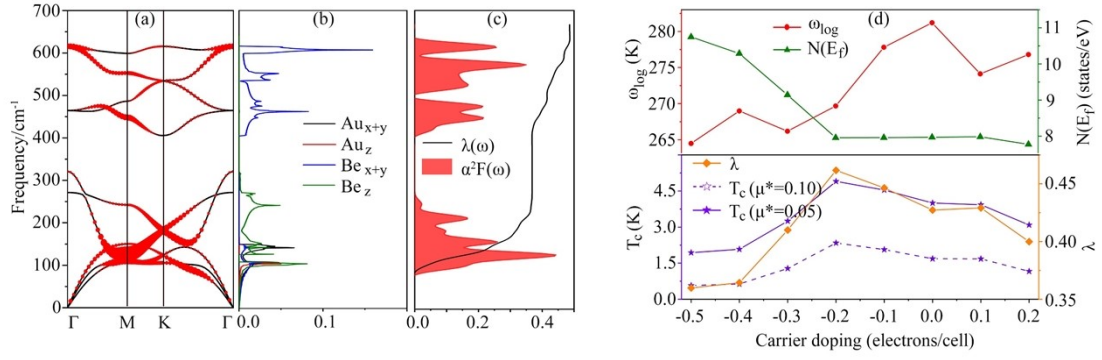

**Figure S15.** (a) Phonon dispersion with electron-phonon coupling strength, (b) phonon density of states (PhDOS), (c) Eliashberg spectral function  $\alpha^2F(\omega)$  and the overall electron-phonon coupling strength  $\lambda(\omega)$  of the Be<sub>2</sub>Au monolayer under doping of 0.2 electrons per unit cell, and (d) evolution of the logarithmic average frequency  $\omega_{\log}$ , the density of states at the Fermi level  $N(E_f)$ , the superconducting transition temperature  $T_c$  and the cumulative frequency-dependent EPC  $\lambda(\omega)$  versus the applied carrier doping.

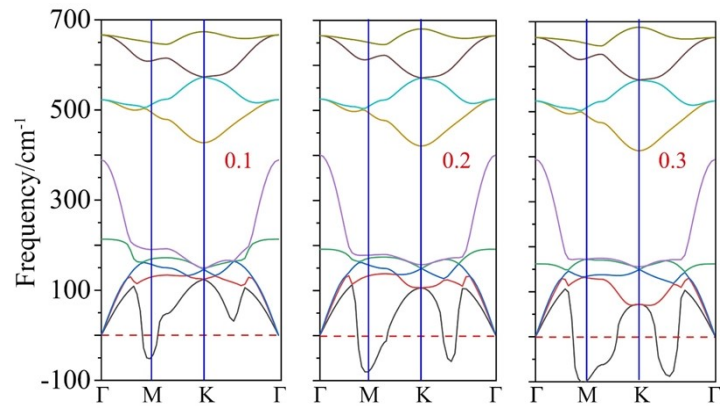

**Figure S16 (a).** Phonon dispersion spectra for Be<sub>2</sub>Au monolayer under hole doping from 0.1 to 0.3 hole per unit cell based on a strain of -1.6%.

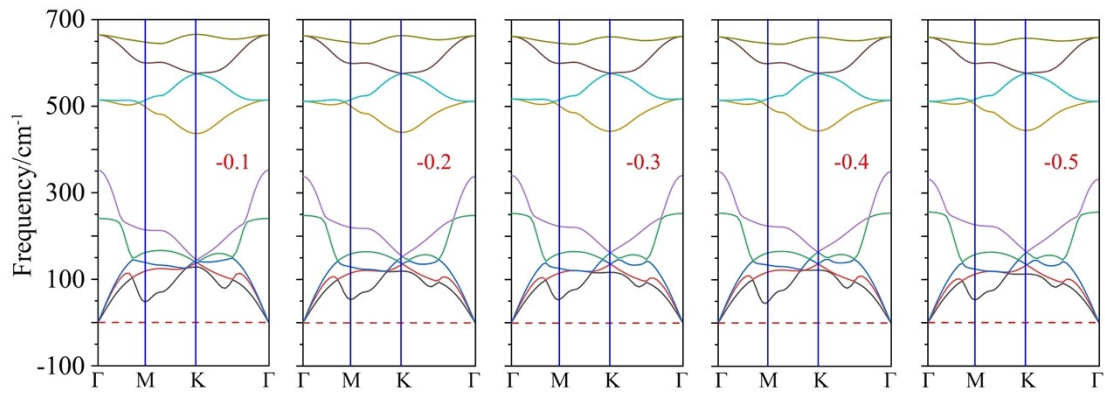

**Figure S16 (b).** Phonon dispersion spectra for Be<sub>2</sub>Au monolayer under electron doping from -0.1 to -0.5 electron per unit cell based on a strain of -1.6%.

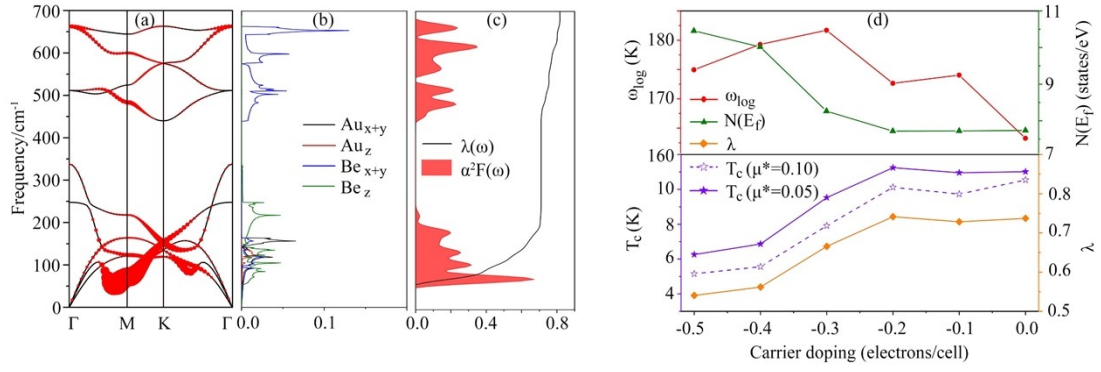

**Figure S17.** (a) Phonon dispersion with electron-phonon coupling strength, (b) phonon density of states (PhDOS), (c) Eliashberg spectral function  $\alpha^2F(\omega)$  and the overall electron-phonon coupling strength  $\lambda(\omega)$  of the Be<sub>2</sub>Au monolayer under doping of 0.2 electrons per unit cell based on a strain of -1.6%, and (d) evolution of the logarithmic average frequency  $\omega_{\log}$ , the density of states at the Fermi level  $N(E_F)$ , the superconducting transition temperature  $T_c$  and the cumulative frequency-dependent EPC  $\lambda(\omega)$  versus the applied electron doping based on a strain of -1.6%.

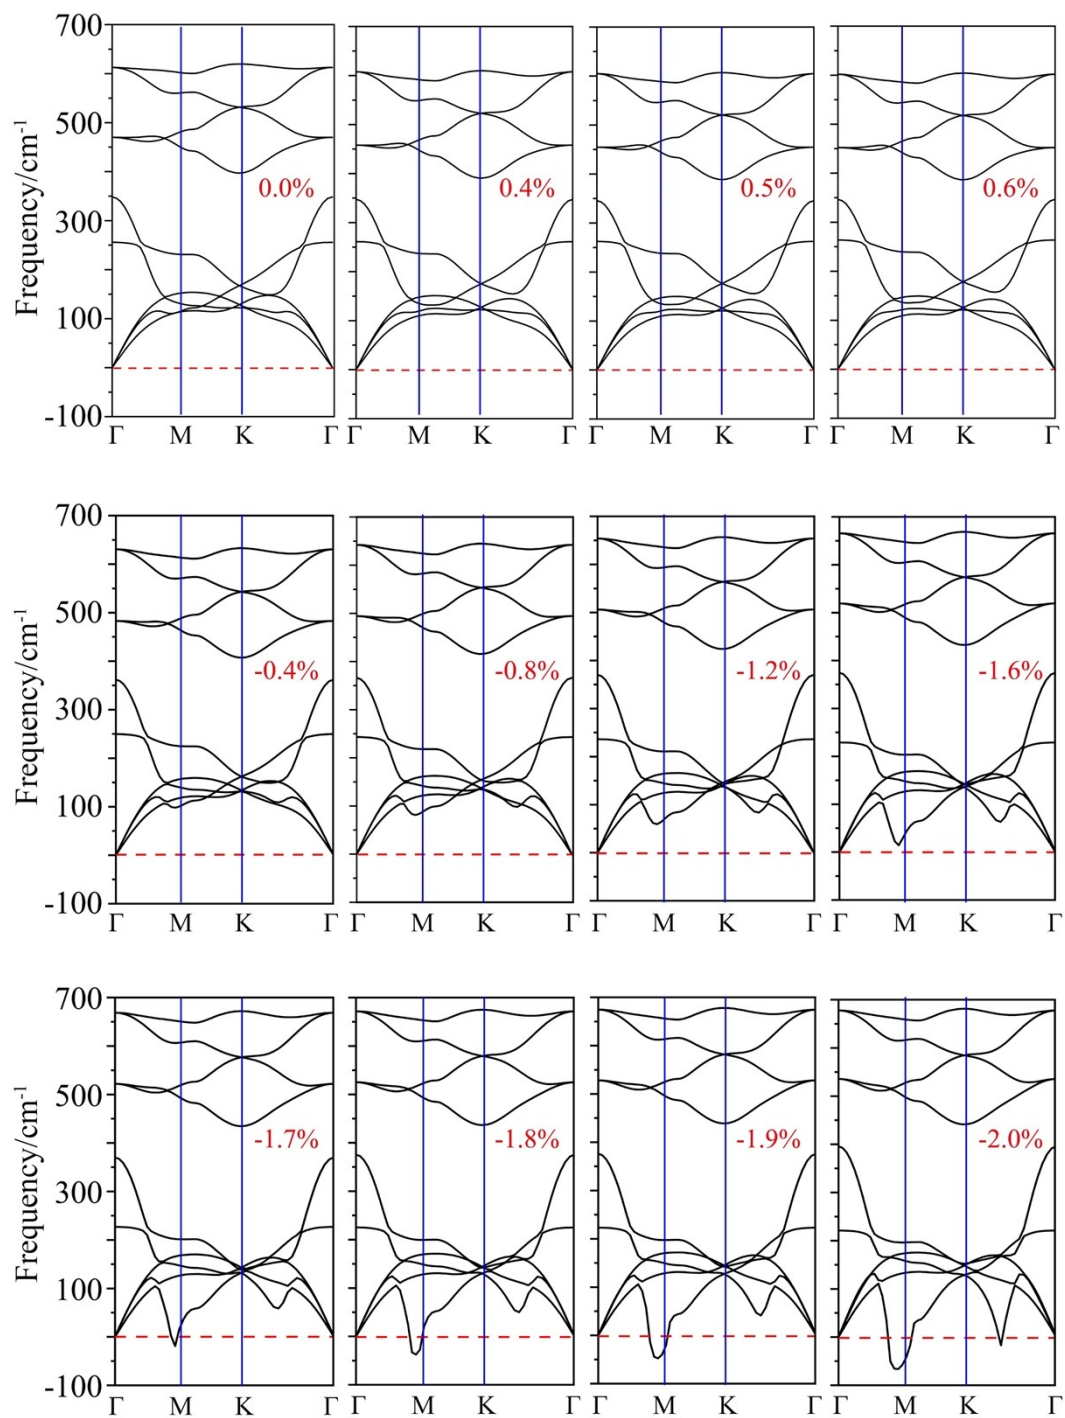

**Figure S18.** Phonon dispersion spectra for Be<sub>2</sub>Au monolayer under strain from -1.6% to 0.6%.

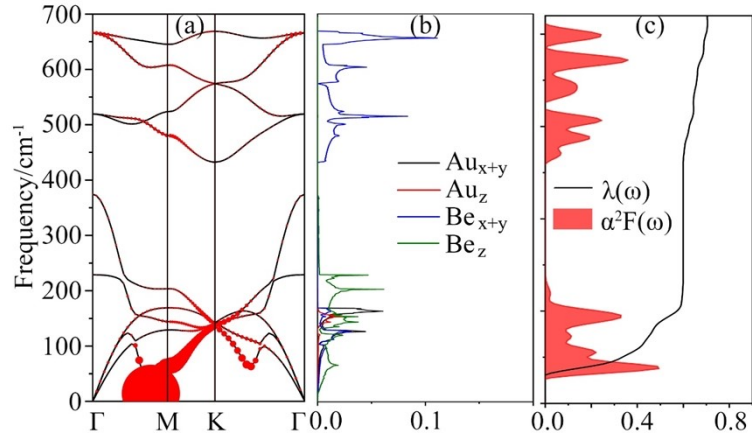

**Figure S19.** (a) Phonon dispersion with electron-phonon coupling strength, (b) phonon density of states (PhDOS), (c) Eliashberg spectral function  $\alpha^2F(\omega)$  and the overall electron-phonon coupling strength  $\lambda(\omega)$  of the Be<sub>2</sub>Au monolayer under strain = -1.6%.

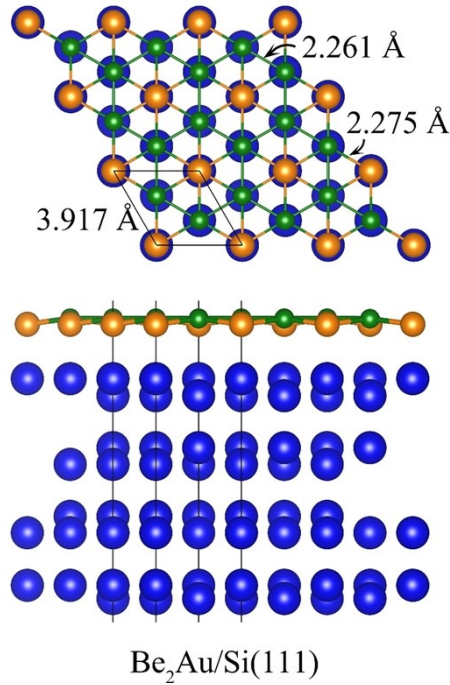

**Figure S20.** Top and side views of Be<sub>2</sub>Au monolayer on Si(111) surface.
